# Supplementary material
Source: Copernicus journal article supplement (doi:10.5194/acp-26-8407-2026)
Supplement: Supplementary file 1 [file acp-26-8407-2026-supplement.pdf]

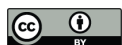

*Supplement of*

## **Impact of northward tropical cyclones on ozone in Southeastern China**

**Shanshan Ouyang et al.**

*Correspondence to:* Tao Deng (tdeng@gd121.cn) and Shaw Chen Liu (shawliu@jnu.edu.cn)

The copyright of individual parts of the supplement might differ from the article licence.

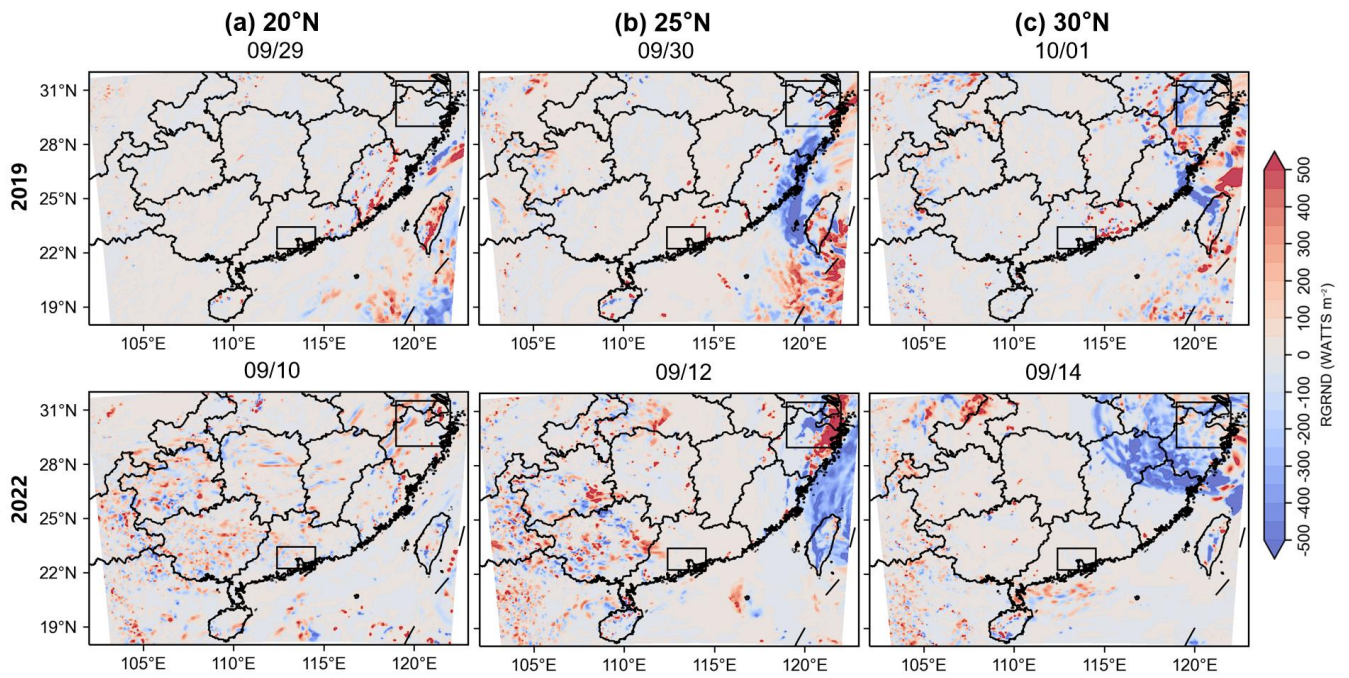

15

**Figure S1: Difference in solar radiation reaching surface (RGRND) between IT\_TC and CTL at 14:00.**

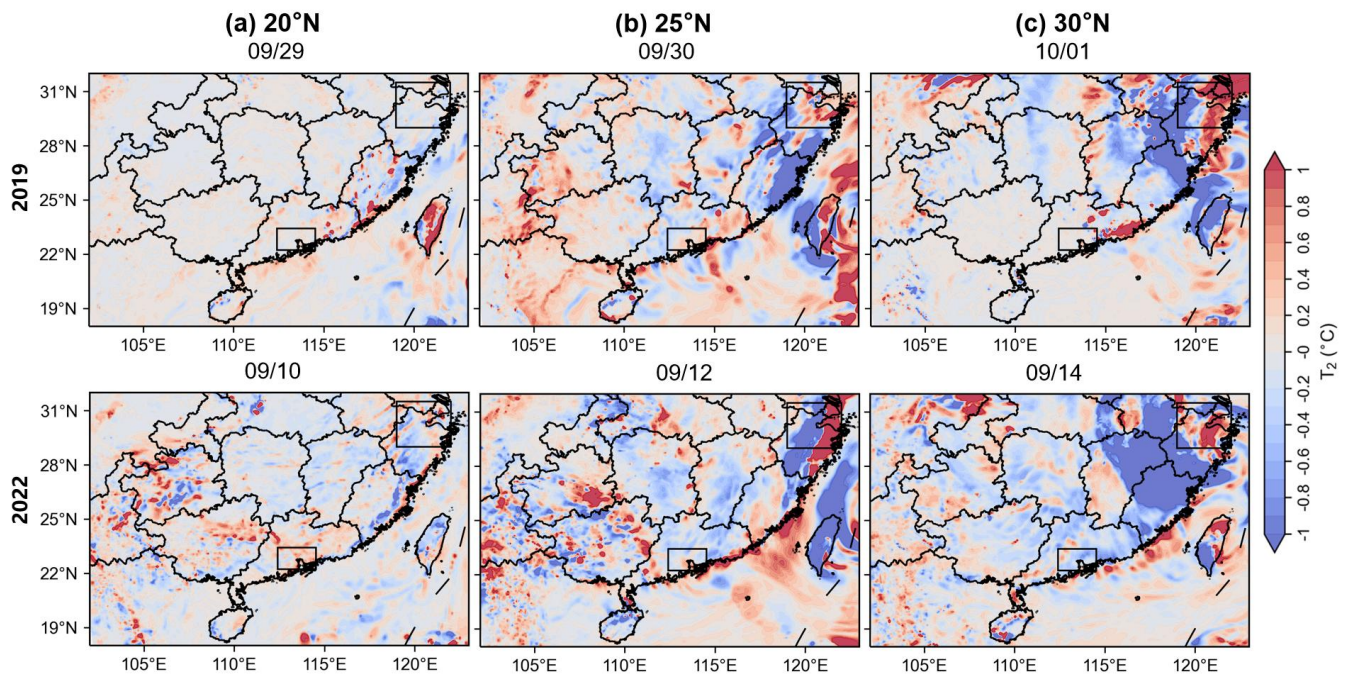

Figure S2: Same as Fig. S1 but for 2 m temperature ( $T_2$ ).

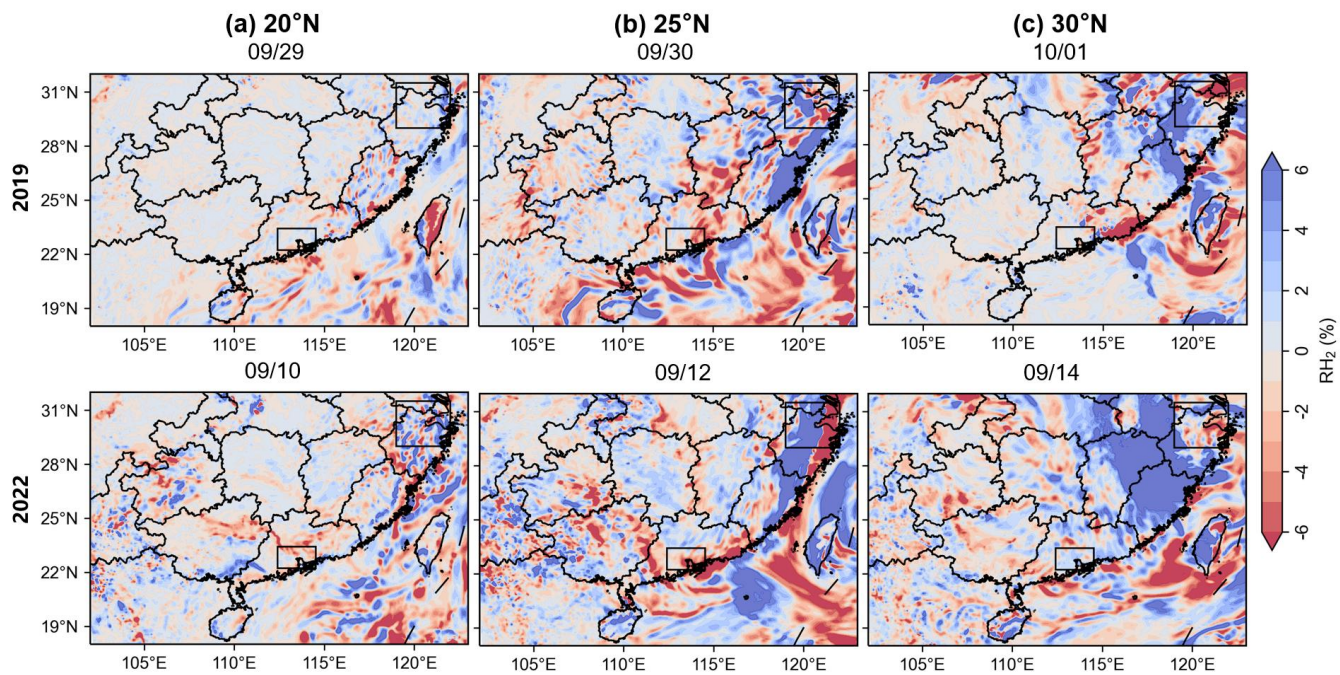

Figure S3: Same as Fig. S1 but for 2 m relative humidity (RH<sub>2</sub>).

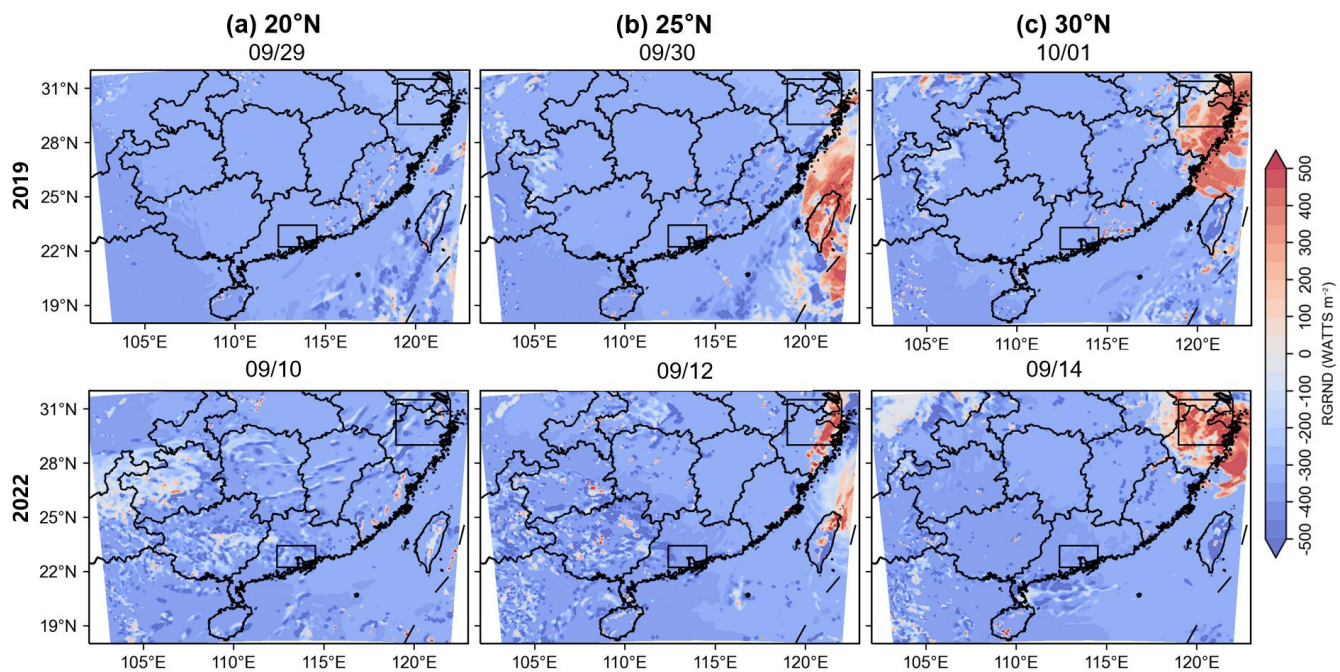

25 Figure S4: Difference in RGRND between NO\_TC and CTL at 14:00.

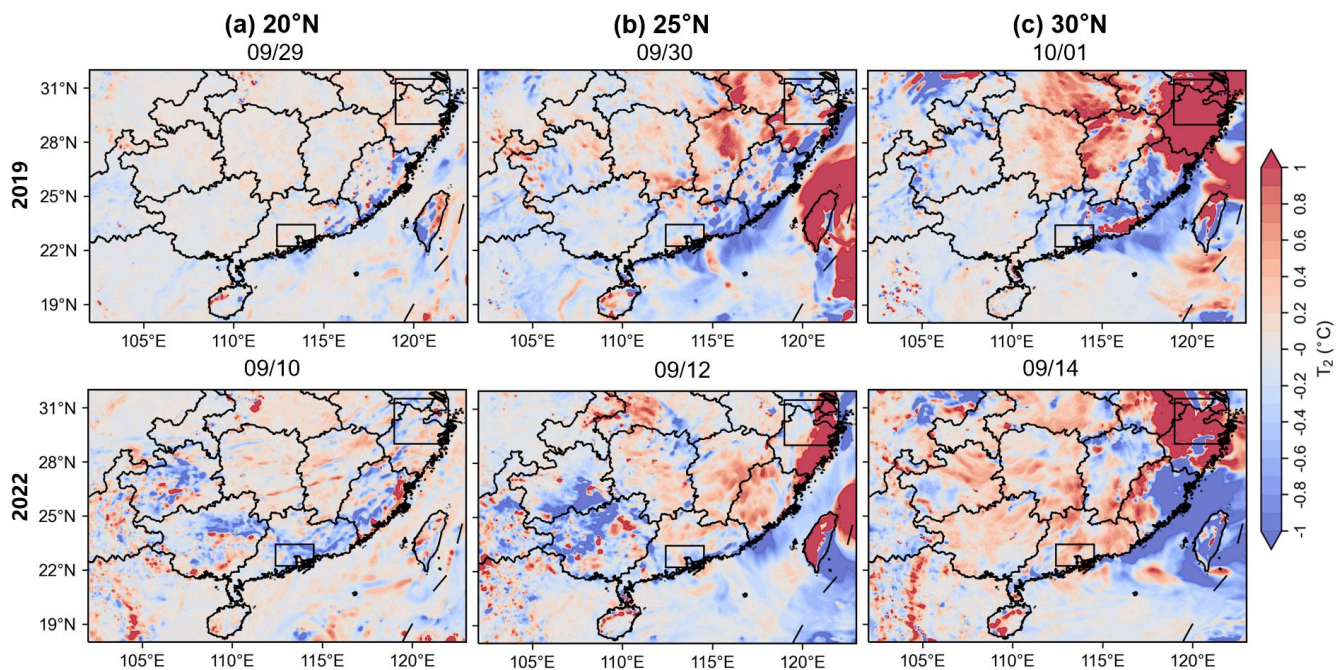

Figure S5: Same as Fig. S4 but for  $T_2$ .

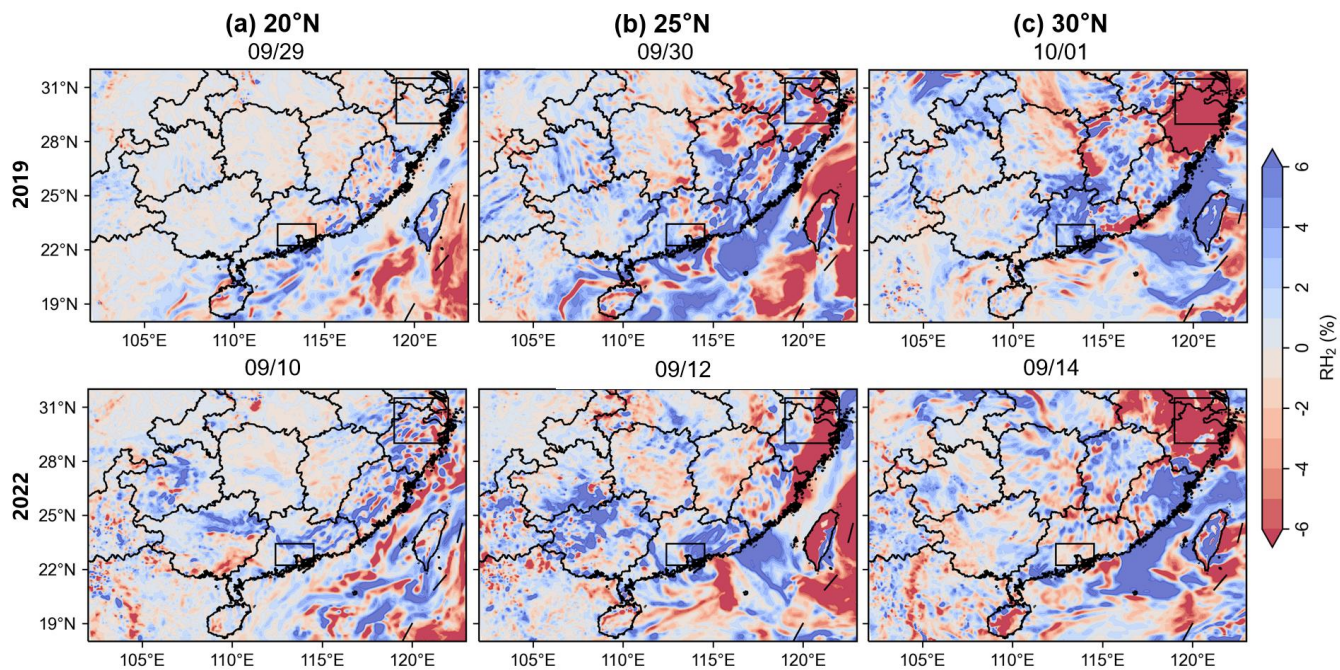

30

Figure S6: Same as Fig. S4 but for  $RH_2$ .
